# Supplementary material for: Efficacy and safety of tacrolimus combined with low-dose glucocorticoids vs. high-dose glucocorticoids in initial treatment of adult-onset minimal change disease: a retrospective cohort study
Source: PeerJ journal article supplement (doi:10.7717/peerj.21089), 2026-04-13
Supplement: Codebook.pdf [file Codebook.pdf]

This codebook describes the meaning of numerical codes used for categorical variables in the raw data file.

| Variable | Meaning of Numerical Code |
|----------|---------------------------|
| group    | 0=GCs group, 1=TAC group  |
| replase  | 0=No, 1=Yes               |
| gender   | 1=male, 2=female          |

The following list denotes the variable abbreviations and their corresponding full names in the raw data file.

| Abbreviation                           | Full name                            |
|----------------------------------------|--------------------------------------|
| SBP(mmHg)                              | Systolic Blood Pressure              |
| DBP(mmHg)                              | Diastolic Blood Pressure             |
| HB(g/L)                                | Hemoglobin                           |
| UTP (g/24h)                            | Urine Total Protein                  |
| Scr( $\mu\text{mol/L}$ )               | Serum creatinine                     |
| eGFR( $\text{ml/min}/1.73\text{m}^2$ ) | Estimated Glomerular Filtration Rate |
| TC( $\text{mmol/L}$ )                  | Total Cholesterol                    |
| TG( $\text{mmol/L}$ )                  | Triglycerides                        |
| BUA( $\mu\text{mol/L}$ )               | Blood Uric Acid                      |
| ALB(g/L)                               | Albumin                              |
| IgG (g/L)                              | Immunoglobulin G                     |
| CR                                     | Complete remission                   |
| NA                                     | Not Applicable                       |
